# Supplementary material for: Effect of copper metalation of tetrabenzoporphyrin donor material on organic solar cell performance
Source: Royal Society of Chemistry journal article supplement (doi:10.1039/c4ta01068j), 2014-01-01
Supplement: c4ta01068j1.pdf [file c4ta01068j1.pdf]

## Effect of Copper Metalation of Tetrabenzoporphyrin Donor Material on Organic Solar Cell Performance

Michele Guide,<sup>a, b</sup> Jason D. A. Lin,<sup>b</sup> Christopher M. Proctor,<sup>c</sup> Jingrun Chen,<sup>d</sup> Carlos García-Cervera,<sup>d</sup> Thuc-Quyen Nguyen<sup>a, b, e</sup>

### Supplementary Information

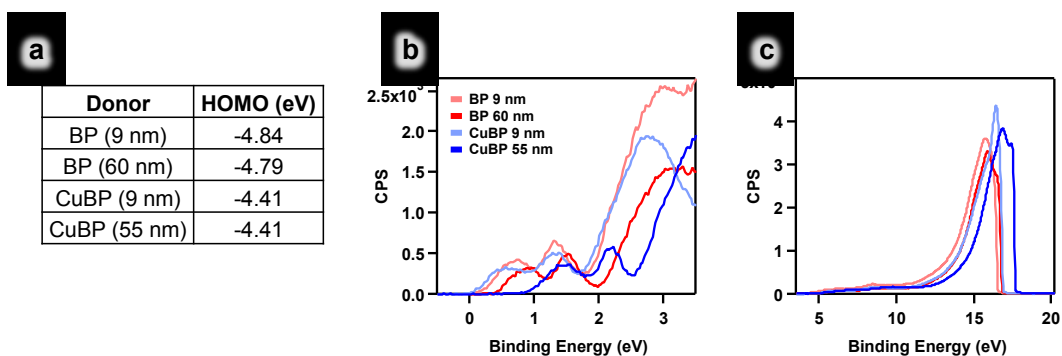

Figure S1. Ultraviolet Photoelectron Spectroscopy (UPS) HOMO and LUMO levels (a), expanded spectra (b) and full spectra (c).

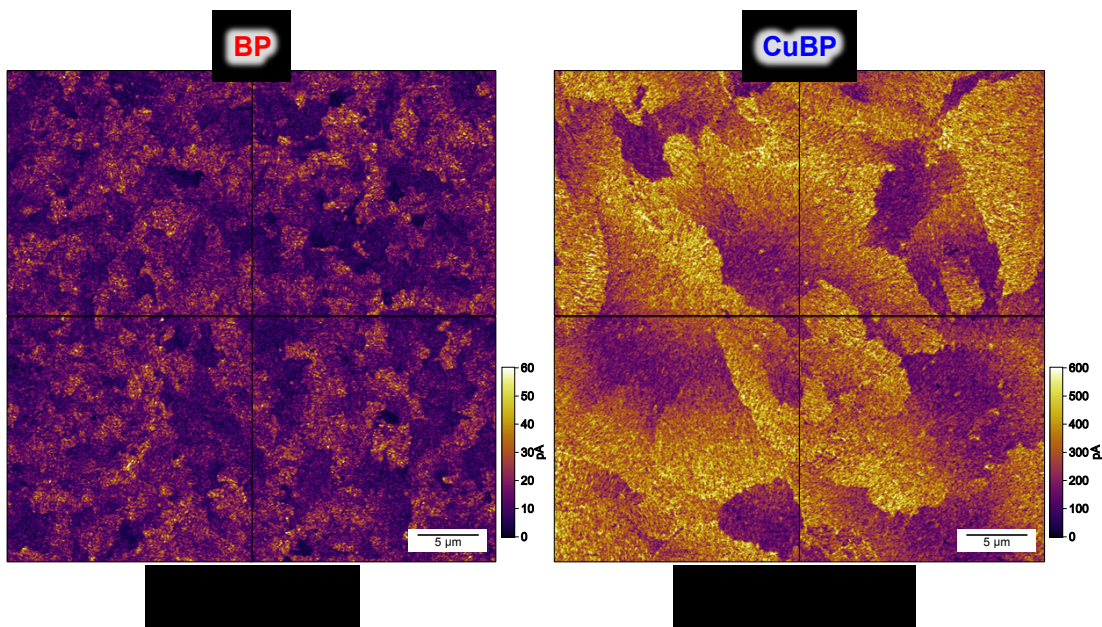

Figure S2. C-AFM current images corresponding to the height images in Figure S12 above, collected at +10 mV applied bias with a gold-coated AFM probe in contact mode.

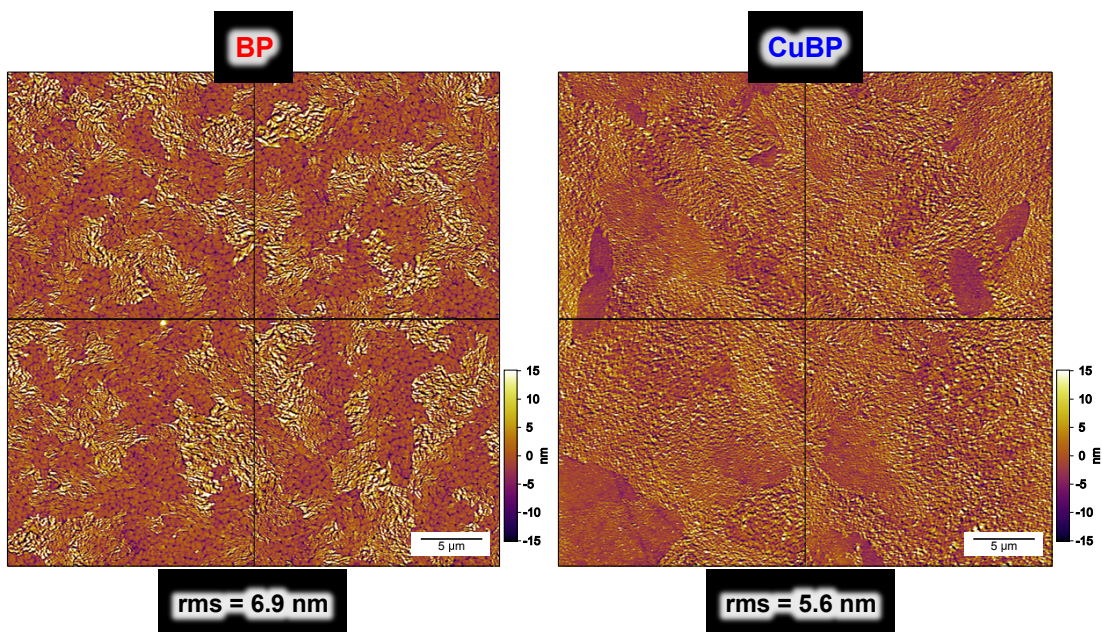

Figure S3. C-AFM topography images of BP (left) and CuBP (right) neat films, with the architecture ITO/PEDOT:PSS/donor (55 nm). Larger area arrays of the images shown in Figure 5 in the main text. Total area shown in images is  $40 \times 40 \mu\text{m}$ .

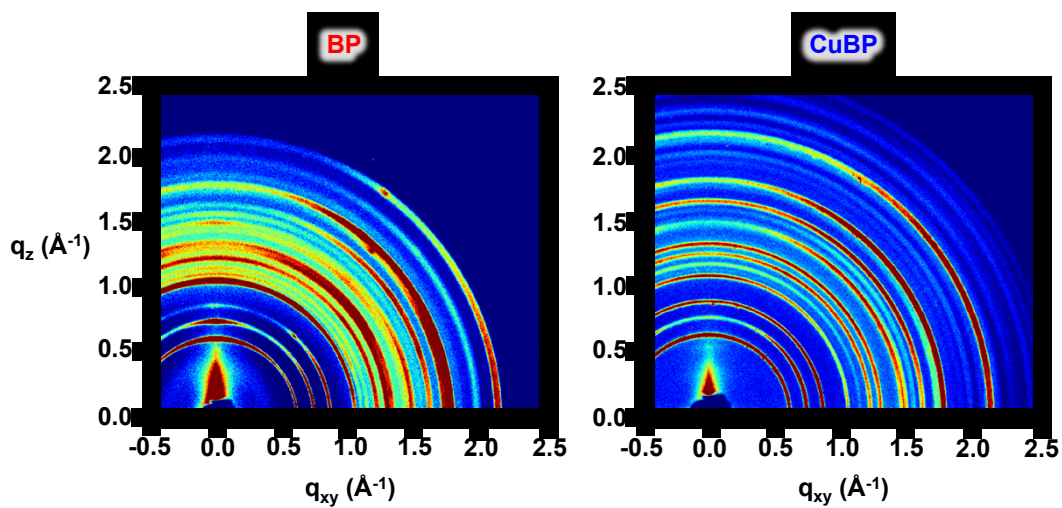

Figure S4. 2-D grazing incidence wide-angle X-ray scattering (GIWAXS) images of BP (left) and CuBP (right) films prepared on Si substrates using the same processing procedure used to make films for AFM characterization. Images collected at beam line 11-3 of the Stanford Synchrotron Radiation Light Source using an X-ray energy of 12.735 keV.

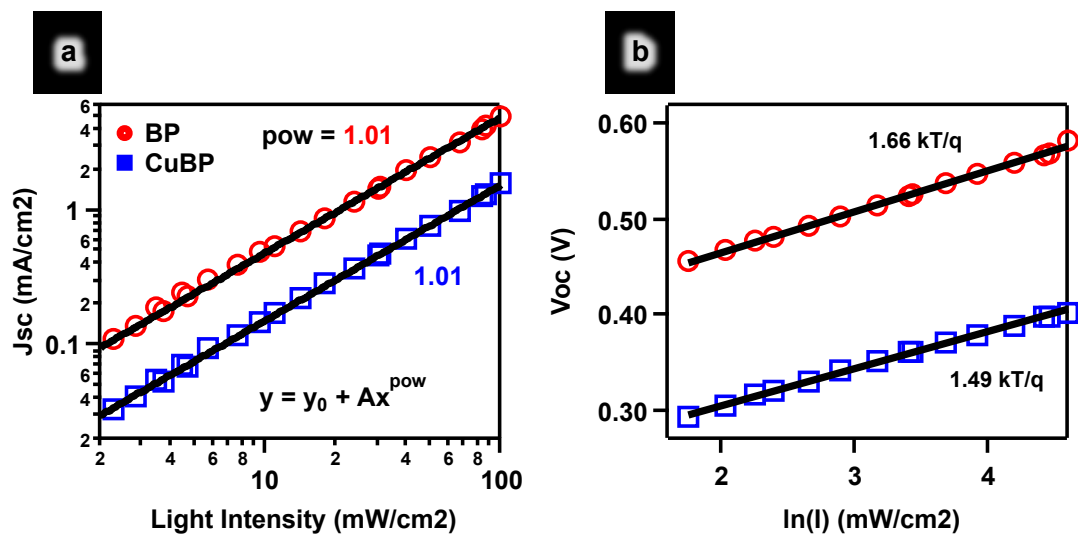

Figure S5. Light-intensity dependent open circuit voltage (a) and short circuit current (b) for bilayer organic photovoltaic devices with BP (red circles) and CuBP (blue squares).
